# Supplementary material for: A unique de novo gain-of-function variant in CAMK4 associated with intellectual disability and hyperkinetic movement disorder
Source: PubMed Central journal article supplement (PMC6318768; doi:10.1101/mcs.a003293), 2018-12
Supplement: supp_mcs.a003293_Supplemental_Figures_Table.pdf [file supp_mcs.a003293_Supplemental_Figures_Table.pdf]

**Supplemental Figure S1** Uncropped western blot from Figure 3B

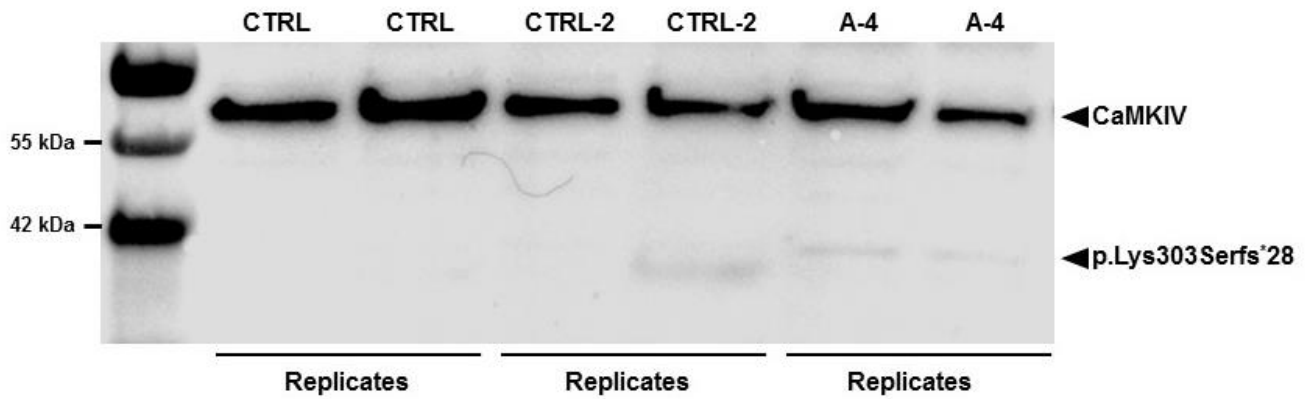

Western blot analysis using an anti-human CaMKIV antibody raised against the N-terminus of the protein. A truncated protein of ~37kDa (p.Lys303Serfs\*28) was detected in proband A-4's cells but not in control cells. The experiment was performed with fibroblasts derived from proband A-4 (A-4) and two healthy controls (CTRL, CTRL-2). Two biological replicates are shown for each cell line (CTRL, CTRL-2, A-4).

**Supplemental Figure S2** Uncropped western blots and raw data from Figure 3D

| Line | Treatment | Biological replicate | Ratio phospho-CREB/CREB | Group mean  | Group SEM  |
|------|-----------|----------------------|-------------------------|-------------|------------|
| CTRL | Veh       | 1                    | 0,921508064             | 0,845616429 | 0,0560038  |
| CTRL | Veh       | 2                    | 0,879012188             |             |            |
| CTRL | Veh       | 3                    | 0,736329036             |             |            |
| CTRL | STO       | 1                    | 0,737350621             | 0,88704119  | 0,07485376 |
| CTRL | STO       | 2                    | 0,963836879             |             |            |
| CTRL | STO       | 3                    | 0,959936071             |             |            |
| A-4  | Veh       | 1                    | 1,315992206             | 1,238676304 | 0,15510993 |
| A-4  | Veh       | 2                    | 0,93983773              |             |            |
| A-4  | Veh       | 3                    | 1,460198977             |             |            |
| A-4  | STO       | 1                    | 1,098995996             | 0,84822229  | 0,12542646 |
| A-4  | STO       | 2                    | 0,728294404             |             |            |
| A-4  | STO       | 3                    | 0,71737647              |             |            |

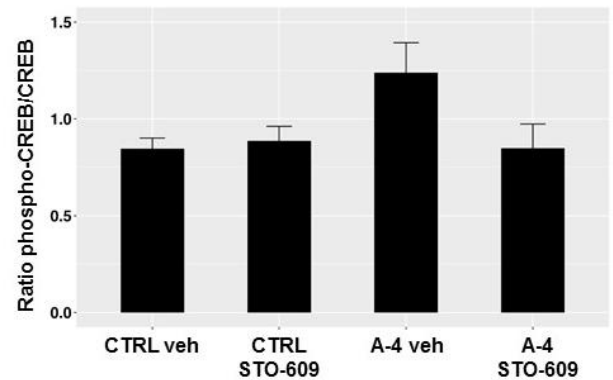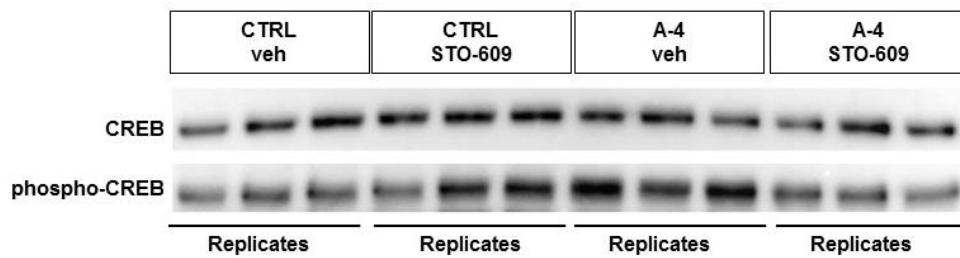

Bottom: western blot analysis assessing phospho-CREB and total CREB expression in fibroblasts derived from proband A-4 (A4) and a healthy control (CTRL). Cells were treated with vehicle (veh) or STO-609, an inhibitor of CaMKK activity. Three biological replicates are shown for each condition (CTRL-veh, CTRL-STO-609, A4-veh, A4-STO-609). Top: table and bar plot showing results of densitometric quantification, depicting the ratio of phosphorylated CREB to total CREB. Data in the bar plot are presented as mean  $\pm$  standard error of the mean, n = 3.

**Supplemental Table** Recessive variants identified in proband A-4

| Gene         | OMIM disease-association | Genomic position (hg 19) | RefSeq transcript | Variation nucleotide | Variation amino acid | Variant type | Known disease-causing mutation (ClinVar) | dbSNP142    | Frequency in-house exomes (N=12,000) (allele count/ total allele number) | Frequency gnomAD (allele count/ total allele number) | Mode                  |
|--------------|--------------------------|--------------------------|-------------------|----------------------|----------------------|--------------|------------------------------------------|-------------|--------------------------------------------------------------------------|------------------------------------------------------|-----------------------|
| <i>EPPK1</i> | no                       | chr8:144940706           | NM_031308         | c.6716G>A            | p.Arg2239His         | missense     | no                                       | rs112377501 | 98/24,000                                                                | 1,035/219,198                                        | compound heterozygous |
| <i>EPPK1</i> | no                       | chr8:144941879           | NM_031308         | c.5543C>T            | p.Ala1848Val         | missense     | no                                       | rs150969952 | 106/24,000                                                               | 653/277,068                                          | compound heterozygous |
| <i>HYDIN</i> | yes (MIM: 608647)        | chr16:70934984           | NM_001270974      | c.8971C>A            | p.Pro2991Thr         | missense     | no                                       | not found   | 33/24,000                                                                | 87/246,152                                           | compound heterozygous |
| <i>HYDIN</i> | yes (MIM: 608647)        | chr16:71212894           | NM_001270974      | c.318A>G             | p.Ile106Met          | missense     | no                                       | not found   | not found                                                                | 4/276,608                                            | compound heterozygous |

A search for rare biallelic variants in the trio-whole-exome sequencing datasets from proband A-4 and his parents detected four compound heterozygous variants in *EPPK1* and *HYDIN*. The *EPPK1* variants were deemed unlikely to be responsible for proband A-4's neurodevelopmental phenotype because of the predominant role of *EPPK1* in keratinocyte proliferation and wound healing. In addition, we observed a large number (N=240) of in-house-sequenced exomes from individuals with no overlapping phenotypes that contained  $\geq 2$  rare non-synonymous variants in *EPPK1*. The *HYDIN* variants were dismissed because loss-of-function mutations in this gene cause primary ciliary dyskinesia type 5, characterized by progressive decline in lung function and recurrent airway infections, symptoms not seen in proband A-4. In all, an identifiable recessive locus for proband A-4's clinical presentation was considered unlikely.
